# Supplementary material for: An antisense RNA controls synthesis of an SOS-induced toxin evolved from an antitoxin
Source: PubMed Central journal article supplement (PMC1891008; doi:10.1111/j.1365-2958.2007.05688.x), 2007-05-01
Supplement: mmi0064-0738-fs1.pdf [file mmi0064-0738-fs1.pdf]

**Fig. S1.** SymE overexpression leads to reduced levels of *lacI* mRNA with and without a start codon.

MG1655 P<sub>cp18</sub>-*araE* and MG1655 P<sub>cp18</sub>-*araE lacI*<sub>GTA</sub> (GSO129) carrying either pBAD24 or pBAD-SymE were grown to OD<sub>600</sub> ~0.5 at 37°C in M9 minimal medium supplemented with glycerol and casamino acids. Total RNA isolated at 0, 30, and 90 min after treatment with 0.02% arabinose (indicated by the arrow). Samples (5 µg) were analyzed by Northern hybridization using an oligonucleotide probe specific to *lacI*. The start codon mutation in *lacI* was generated in GSO120 using the mini-λ Red recombination method (Court et al., 2003) and a single-stranded oligonucleotide with a single mutation (ATG to GTA).

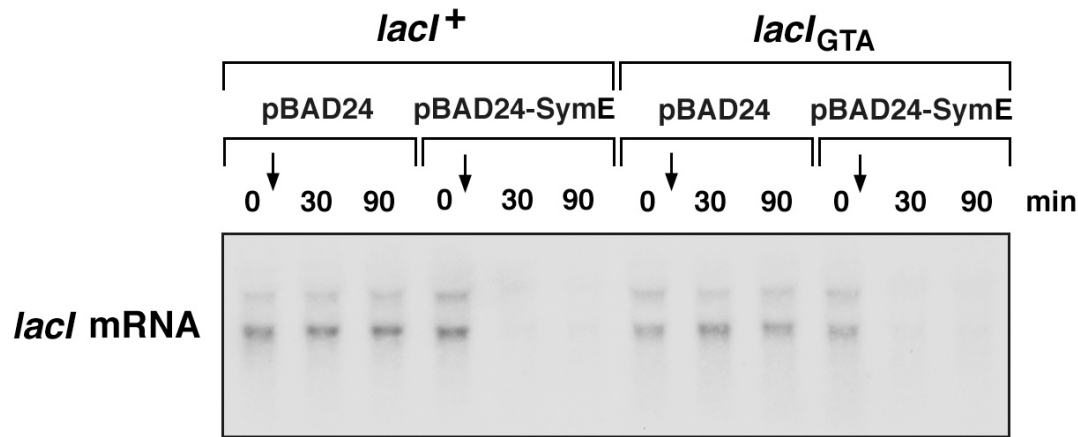

**Fig. S2.** Multiple alignment of the SymE family and other members of the AbrB superfamily

Proteins are denoted by gene name, species abbreviation, and gi number; separated by underscores. The gi number can be used as a unique identifier to recover the protein from the Genbank database. Amino acid residues are colored according to side chain properties and the percentage of conservation as indicated in the consensus below the alignment. Consensus similarity designations and coloring scheme are as follows: ‘h’, hydrophobic residues (ACFILMVWY) and their aromatic subset, ‘a’ are shaded yellow; ‘s’ small residues (AGSVCDN) shaded aqua and their tiny subset (GAS) are shaded green; polar residues ‘p’ are colored orange. Secondary structure assignments obtained from the JPRED prediction for the SymE family and from the crystal structures like 1mvf and 1ub4 for the rest of the AbrB superfamily are shown above the alignment where E represents a strand and H represents a helix. The boundaries of the alignment are shown to the right. Species abbreviations are as follows: *Amac* : *Alteromonas macleodii*; *Amet* : *Alkaliphilus metalliredigenes*; *Ana* : *Nostoc sp.*; *Atum* : *Agrobacterium tumefaciens*; *Bcla* : *Bacillus clausii*; *Bsp.* : *Burkholderia sp.*; *Bvie* : *Burkholderia vietnamiensis*; *Bxen* : *Burkholderia xenovorans*; *Cchl* : *Chlorobium chlorochromatii*; *Drad* : *Deinococcus radiodurans*; *Ecar* : *Erwinia carotovora subsp.*; *Ecol* : *Escherichia coli*; *Efae* : *Enterococcus faecalis*; *Gkau* : *Geobacillus kaustophilus*; *Gmet* : *Geobacter metallireducens*; *Goxy* : *Gluconobacter oxydans*; *Gura* : *Geobacter uraniumreducens*; *Gvio* : *Gloeobacter violaceus*; *Hche* : *Hahella chejuensis*; *Ipla* : *IncL/M plasmid*; *Lint* : *Leptospira interrogans*; *Maqu* : *Marinobacter aquaeolei*; *Mcel* : *Mycobacterium celatum*; *Moth* : *Moorella thermoacetica*; *Neur* : *Nitrosomonas europaea*; *Ngon* : *Neisseria gonorrhoeae*; *Nmen* : *Neisseria meningitidis*; *Nmob* : *Nitrococcus mobilis*; *Paci* : *Pediococcus acidilactici*; *Plum* : *Photorhabdus luminescens*; *Pnap* : *Polaromonas naphthalenivorans*; *Ppha* : *Pelodictyon phaeoclathratiforme*; *Ppro* : *Photobacterium profundum*; *Pput* : *Pseudomonas putida*; *Psyr* : *Pseudomonas syringae*; *Reut* : *Ralstonia eutropha*; *Rfer* : *Rhodoferrax ferrireducens*; *Rnub* : *Roseovarius nubinhibens*; *Rpal* : *Rhodopseudomonas palustris*; *Sent* : *Salmonella enterica*; *Sfle* : *Shigella flexneri*; *Sfri* : *Shewanella frigidimarina*; *Smut* : *Streptococcus mutans*; *Srub* : *Salinibacter ruber*; *Styp* : *Salmonella typhimurium*; *Susi* : *Solibacter usitatus*; *Swol* : *Syntrophomonas wolfei*; *Syn* : *Synechococcus sp.*; *Vcho* : *Vibrio cholerae*; *Xaxo* : *Xanthomonas axonopodis*; *Xcam* : *Xanthomonas campestris*; *Xory* : *Xanthomonas oryzae*; *Ypes* : *Yersinia pestis*; *Ypse* : *Yersinia pseudotuberculosis*.

Secondary Struc.

SymE\_Ecol\_49176495

SF4363\_Sfle\_24054893
yjiW\_Sent\_62182949
yjiW\_Styp\_16767767
plu3716\_Plum\_36787014
YintA\_01002156\_Yint\_77978014
ECA2121\_Ecar\_49611575
YP3938\_Ypes\_45438536
ECA4295\_Ecar\_49613741
ECA3402\_Ecar\_49612852
ECA4289\_Ecar\_49613735
ECA3392\_Ecar\_49612842
ECA3418\_Ecar\_49612868
orf8\_Plum\_27497170
plu3380\_Plum\_36786688
XCC3569\_Xcam\_21114842
XCC3103\_Xcam\_21114326
XOO2821\_Xory\_58582444
XOO1835\_Xory\_84367432
XOO1938\_Xory\_58426155
XOO0917\_Xory\_58580540
XOO0162\_Xory\_58579785
XOO0141\_Xory\_84365738
XAC1914\_Xaxo\_21108128
XAC2863\_Xaxo\_21109161
STM0296\_Styp\_16418797
STM0294.1N\_Styp\_39546291
STY0328\_Sent\_16501578
SF0591\_Sfle\_24050834
plu3699\_Plum\_36786998
plu3591\_Plum\_36786895
plu1147\_Plum\_36784541
ECA2120\_Ecar\_49611574
ECA3393\_Ecar\_49612843
ECA3410\_Ecar\_49612860
ECA3419\_Ecar\_49612869
YPTB3619\_Ypse\_51591192
YP3939\_Ypes\_45438537
EF\_2302\_Efae\_29344269
HCH\_03808\_Hche\_83646529
ECA0399\_Ecar\_49609882
Bcep18194\_B2924\_Bsp\_77971656
Bxe\_A4510\_Bxen\_91782963
consensus/90%

-----EEEEEE-----eEEEE.HHHHHH-----EEEEEE-----EEEEEE-----

ANNRHVTVGYASRYP-----DYSRI PAITLKGQWLEAAGFATGTAVDVKVMEGCIVLTAQPPAA [ 18- 76]
ANNRQLTVSYASRYP-----DYSRI PAITLKGQWLEAAGFATGTAVDVKVMEGCIVLTAQPPAA [ 18- 76]
ANNRHLLTVSYASSYP-----EYTRI PAITLKGQWLEADAGFTTGTQVDVVMNGCIVLTAQQPQP [ 18- 76]
TNNRHLLTVSYASRYP-----DYTRI PALTMKGWLEAAGFATGTEVDVVMNGCIVLTAQQPQP [ 18- 76]
VKPRHYTVGYRPNRG-----KPNPY PQLTIKGRWLAALGFTTGKPIITITSEAGQLIIQLAEND- [ 18- 75]
PQARKSIVGYRPNNG-----RPNPL PQLTIRGRWLEPLGFTTGQKIEVITEFGQLIIRLAVEG- [ 13- 70]
APASPVSSGYRTNGG-----KPNPL PQLTIKGRWLEALGFTKGQPVSIITAEHGQLIIRRTAPATK [ 7- 65]
KTERYYTVGYVPQRG-----KRNPP PAINLKGRWLEALGFSSGQPVLIITVEHGRLLVIQPEIKI- [ 17- 74]
KIARYYTVGYALKNG-----KPNPP PAIDLKCRWLESSGFMTGIPITITVVERRRLVIEETEINL- [ 13- 70]
KTERYYTVGYASHNG-----KPNPP SAINLKGRWLEECGFITGMPVTVTVERGRIIIETQINL- [ 17- 74]
KTERYYTVGYAPHNG-----RPNPP SAINLKGRWLEESGFMTGMPITVTVVERGRIVIEETEINL- [ 17- 74]
QAERFTRVGYRPIK-----GNHDT PAINIAGQWLKDAAGFTTGQSLKLRIMPGCIVITTTQDIHE [ 17- 74]
QAERFTRVGYRPIK-----GNHAT PAINIAGQWLKDAAGFTTGQPLRLRIMPGCIVITTTQDIHE [ 17- 74]
KTERYYTVGYVPNGNR-----VNDAT PAIBLKGQWLROAGFNTGGQITVVMMDGCLVLIIPDSEAT [ 17- 76]
KRDNKTIRRIISQAERFGK-----VAKNG ISLKGKWLQEAAGFTFGMPLKIRVMPDCIVITTAQNTQE [ 3- 62]
RRPRQCTVSYTYLPGAHDHA---GDQHV PHVRLSGLWLQQLGFAIGTKLRITASVGRLLMEVLPVVG [ 38-101]
RTPTSCYTVGYAFYEAEPGRP---HSQRI PSVRLRGLWLEQLGFAVGCCKLQITARKGELVVTVVERAPS [ 80-143]
RRPRQCTVSYTHYPGAHDHA---GDQHV PHVRLSGLWLQQLGFAIGTKLRITANAGQLLMEVLPVVE [ 65-128]
RTPTRCTVGYAFYDAEPGRP---DSQRI PNVRLRGLWLEQLGFAVGCCKLQITARNGELVVTVVAED-- [ 70-131]
RTPTRCTVGYAFYDAEPGRP---DSQRI PNVRLRGLWLEQLGFAVGCCKLQITARNGELVVTVVAED-- [ 36- 97]
RPTKQCTVGYGYYPN-----SQQRV PTLRLRGGWLEQLGFAIGSKLRVTVHDCALVIAVIDEEC [194-252]
RATQQCTMGYGYYPD-----SHQRV PALRLRGRWLEQLGFAIGCKLRITVRDSELVITTVVGGEE- [112-169]
RATQQCTMGYGYYPD-----SHQRV PALRLRGRWLEQLGFAIGCKLRITVRDSELVITTVVGGEE- [ 63-120]
RRPRQCTVSYTHYPGAHDHA---GDQHV PHVRLSGLWLQQLGFAIGTKLRITASEGQLLMEVLPVVE [ 65-128]
RPPQCTIGYGYAA-----TQQYV PTVRLRGRWLEQLGFAVVGSKLDIRMREGELVMSLAHKD- [ 60-117]
MARLCGILTYSRV-----ERLSVRLYGEWMPQAGFINGMPVKVRVMDRCIVITTPQHHTG [ 1- 54]
NSETCMTACYSQI-----PSQHLKGDWLEEAGFETGHHGVTVKISEGCLILIIAETDEV [ 12- 63]
MARLCGILTYSRV-----ERLSVRLYGEWMPQAGFINGMPVKVRVMDRCIVITTPQHTRG [ 1- 54]
DRKTGIARYYSQH-----PSLHLKGDWLKEAGFDTGRGVTVKISEGGLTIIADSDEV [ 30- 81]
DRHTGMTRYYSQH-----PSLHLKGNWLEEAGFVTVGQPVQVSVEHGQLIIRLVENS- [ 30- 80]
DRSTGMTRYYSQH-----PSLHLKGNWLEEAGFATGQPVQVSVEHGQLIIRLVENG- [ 30- 80]
DRSTGMTRYYSQH-----PSLHLKGNWLEEAGFATGQPVQVSVEHGQLIIRLVEYN- [ 30- 80]
QQRQDLGADWVRE-----NGGVIIISGDWLTESDIARAEQLEVTAAASGVIRLQRREEV [ 59-111]
DGSETEGADWVGD-----NGELTLAGDWLTQSGL-LGQSLSIEVLLGKITIQAERGNM [ 61-112]
DGNEAEGADWVSD-----NGELTLAGDWLTQSGL-PDQPLIIEVLPGRITIRAVQGNM [ 61-112]
DGNEAEGADWVSD-----NGELTLAGDWLTQSGL-LDQPLIIEVLPGRITIRAVQGNM [ 61-112]
ENDNHIGMDWIQD-----NGELSLSGEWLTQTGL-TGQPLAISVMAGKVIIRGQQGNM [ 64-115]
LKYNNIVMAWIQD-----NGELSLSGEWLTQTGL-TGQPLAISVMAGKVIIRGQQGNM [ 10- 61]
LTVCYGHGNYKQA-----PTQIVLQGWLEQAGFSVGDKITVVKCQQGQLTITKNETGN [ 16- 68]
QRRLKVRKGYDYHLSSSRYDYGFKFPVWMLIKGYWLEQAGFGVDTEVEVSVEGGRIVFTAGAG-- [ 22- 86]
SQALLHLISVSRRHADRSDMTRYYSRSPSLHLQDHWLEAAGFEIDIPVVIITVEQQLVIRPAPE-- [ 9- 73]
PRTSFQTRRIVPHLKLADMA---PPVLHLWMLKSSHWIEAAGFDPEQPLKIEVMHKRLVITPIEDRR [ 19- 82]
PRKPKPGRDWRTPR-----FFSWLRLIAGMWLEQAGFSPQRVRIEVOHGRLVITTPD---- [ 23- 73]
.....a.....s.lpl.G.Wlp..Gh..s..l.lph..spl.hp.....

**Secondary Struc.**

```

MazE_Ecol_31616033 (1mvf)  -MIHSSVKKRWGNS-----PAVRIIPATLMQALNINIDDEVKIDLVLDGKLIIEPVRKEP [ 1-52]
chpR_Ecar_49611137        -MIDVPPVKKWGNS-----PAIRLSSSSVMQAFDMTFNDSFDMREIRETEIALIIPKPKKPK [ 1-51]
SMU_172_Smut_24378686     --MQLVINKRWGNS-----SAIRLPKQLVQELQQLQTNLDVLDYKVSNGKIILEKVNINIP [ 1-50]
RPC_3251_Rpal_90424742    --MKVKVAKRWGNS-----LGIIRLPSAAADS VGATVSGELDLTIENGELRLRSIRKTS [ 1-50]
MaquDRAFT_1702_Maqu_77953495
MazE_Ppro_11344928        -AMRTQIRKIGNS-----LGSIIIPATFIRQLELAEGAEIDVKTVDGKIVIEPIRKMK [ 1-51]
VchoR_01000034_Vcho_75824896
MADE_08556_Amac_88793356 --MRTQIRKIGNS-----LGNIIIPATFIRQLGLVEGADIEVKTEGKRIIIIEPVERQK [ 1-50]
MazE_Paci_31442758        --METVIRKYGNS-----KGVIIIPAAALLKELDLVDVNEKIDVKTENGRIIIIEPMRQLE [ 1-50]
Gmet_2502_Gmet_78194957  IKEQTRLAKWGNS-----KAARIPSQIIKQLKLLDDNQDMTITIENGSIIVLTPPIKKNP [ 31-82]
gsr0095_Gvio_35210655    --MRTNIIIRIGNS-----QGIRIPKVLLEQSHL--GAEVELEVEDEKIIIRSASRPR [ 1-48]
mazE_Ana_17132307         --MKSQVARKWGNS-----LAFRIIPRQIVIQGLKPHHTLLCSVEAGALVVRPVREVK [ 1-50]
PP0770_Pput_26987506      --MTTVVAKWGNS-----LAVRIPRSIAEQAHVTEGTDINFVSEGNISIVITPKRRKK [ 1-50]
Psysr_0889_Psysr_63254851
RPEDRAFT_3008_Rpal_77740482
NGO0517_Ngon_59800955    --MQIKIQQWGNS-----AAIRLPAAVLQKQMRGLVGGSTLSLDTTGETMVLKPVRSKP [ 1-50]
GK1647_Gkau_56380024     --MEVKIQQWGNS-----AAIRLPAANVLKQMSLSSGDVLTLDASAIEVITLKPAAKAKL [ 1-50]
Cag_0428_Cchl_78170605   --MKGQVAQWGNS-----AALRLPKSVLEDLKVAPGSEVEMVVEAGELVRRAAPRIV [ 1-50]
RS9917_04555_Syn_87123100
DR_0416_Drad_6458096     ---MLRLQKWGNS-----AAVRLPARLLTALNAKIGDALETEIRNGELLIRPVKR-- [ 1-47]
PphaDRAFT_1569_Ppha_68550788
Moth_1020_Moth_83589868  SIMTITVQKWGNS-----LAVRIPSVIAERLALHQGSEVEMIVENQAIKLIPKPKK-- [ 10-60]
LA1780_Lint_24214480     --MLTQVKKWGNS-----FALKIPKAIIVSDAKIERDSFIDINIVKGQITIEENVTTQR [ 1-50]
WH5701_04345_Syn_87300647
pemI_Reut_38638041       --MKVKVQAWGNS-----LGLRIPKVFANALGVGSGSEMEVKVEDGALLARPAAA-- [ 1-48]
PnapDRAFT_2207_Pnap_84713095
Rfer_3405_Rfer_89902174  --MTSQIQKWGNS-----LALRIPKALAQQVGLTQSSEVELLLQDQGQIVIRPVPARQ [ 1-50]
SRU_2815_Srub_83815344   --MLTKVQKWGNS-----LALRIPKTWALEARLENNSEVEISLVEGKLVITPVVTIK [ 1-50]
ABC1016_Bcla_56909028    IVMQPHVQKWGNS-----LGIIRIPLSLAQKIGLREGTPVDLQVDEDAIIIRRKQ--- [ 3-51]
XAC2188_Xaxo_21108422    --MESIIQKWGNS-----LGIIRIPKAMATELELNDGSHVELQYEGDKIVIYPMKK-- [ 1-48]
NE0975_Neur_30138595     TPSRQALRRWGNS-----LGIIRLPAAIAREARLQEDQAVELSVVEGRVLRIPVQPR- [ 6-56]
pemI_Xaxo_59938898       KSATLTIQKWGNS-----LAVRIP TAVARS AHFAEQEVEVSVDEIGVTVRVPVGRRA [ 3-54]
SF3433_Sfle_24053885     -MHILKLTQIGNS-----VGVVLPKEALARLKLKGETVFLTETPDGYTLTPYD--- [ 1-48]
GuraDRAFT_3227_Gura_88935131
MazE_Mcel_13810878       -MTTLKLSQIGNS-----VGVILPKELLARLHLEKGDVVFMTDTVNGFTTISPYD--- [ 1-48]
AGR_C1711_Atum_15155939  MPEETTIRRIGNS-----SGLTIPKDLLDRQHLEEGDQVHLVETEDGLLITPYD--- [ 1-49]
AbrB_Bsub_113009 (1yfb)  -MKTTRLRKVGNS-----YGF TIPKELMDKYNLNEGVELNIIIEQNDGFALTPYD--- [ 1-48]
consensus/90%            --MSFKVHPWGNS-----SAVPVPSHVVRKVLGIENGSEVEIEVKDGMIVKPVKGD- [ 1-49]
                    --MAMQVAKWGNS-----LAVRLPSSLVEALELREGDDIETVVDPRFLFAVRKKPGP [ 1-50]
                    --MLQTLRKAGGS-----LVMTVPKSFIEQNGLSEGSQVELHHLHGKMMIVEAPARPR [ 1-50]
                    -MHTTNLRKVGGS-----VMLAVFPALLDVLHIGAGAKVGLAVDNGRLVVEPHARPR [ 1-51]
                    VEAVLGIKQWGNN-----LGVRLP VNVARAAHLHVDQKVRIAVEEGRVIIITPVDDAA [ 4-55]
                    -MFTTKLRKVGGS-----VMLATIPALLEMLDLNAGAPVGLSVDAGQLVVDQPVRPH [ 1-51]
                    -MQTVKLRQGGGA-----MIVTIPRDLAIDLWSPGTELTVEKKGDSVNLRAATEHKP [ 1-51]
                    MTVTTKIRRQGGGA-----AVMTIPALLKMLGLEIQEQLTLEVDNGALVASPVRLK [ 16-67]
                    --MDQAIIRKSSK-----RQITIPAAIYKKLGTQPGQKLFLEVHGDKLIIWPKTKSY [ 1-50]
                    MKSTGIVRKVDEL-----GRVVIPIELRRTLGIAEKDALEIYVDDEKIIILKKYKPN- [ 3-53]
                    .....1.phGsS                ..h.lP..hh..h.h..s..l.h.....h.lps.....

```

**Table S1.** Strains used in study

| <u>Strain</u> | <u>Relevant genotype</u>                                                                | <u>Source or reference</u> |
|---------------|-----------------------------------------------------------------------------------------|----------------------------|
| MG1655        | <i>E. coli</i> F $\lambda$ <i>ilvG</i> <i>rfb-50 rph-1</i>                              | lab stock                  |
| DY330         | W3110 $\Delta$ <i>lacU169 gal490</i> $\lambda$ <i>cI85</i> $\Delta$ ( <i>cro-bioA</i> ) | D. Court                   |
| NM1100        | MG1655 mini- $\lambda$ - <i>tet</i>                                                     | N. Majdalani               |
| GSO114        | MG1655 <i>symE</i> -SPA                                                                 | this study                 |
| GSO115        | MG1655 <i>symR-10 mutant</i>                                                            | this study                 |
| GSO116        | MG1655 <i>symE</i> -SPA <i>symR-10 mutant</i>                                           | this study                 |
| GSO117        | MG1655 $\Delta$ <i>symER::kan</i>                                                       | this study                 |
| GSO118        | MG1655 $\Delta$ <i>symER</i>                                                            | this study                 |
| GSO119        | MG1655 <i>kan</i> -P <sub>CP18</sub> - <i>araE</i>                                      | this study                 |
| GSO120        | MG1655 P <sub>CP18</sub> - <i>araE</i>                                                  | this study                 |
| GSO122        | MG1655 <i>symE</i> -SPA <i>hfq-1::</i> $\Omega$                                         | this study                 |
| GSO123        | MG1655 <i>symE</i> -SPA <i>rnc-14::</i> $\Delta$ Tn10                                   | this study                 |
| GSO124        | MG1655 <i>symE</i> -SPA <i>lon146::</i> Tn10                                            | this study                 |
| GSO125        | MG1655 <i>symE</i> -SPA <i>clpP::cat</i>                                                | this study                 |
| GSO126        | MG1655 <i>symE</i> -SPA <i>symR-10 mutant lon146::</i> Tn10                             | this study                 |
| GSO127        | MG1655 $\Delta$ <i>symER lon146::</i> Tn10                                              | this study                 |
| GSO128        | MG1655 <i>symR-10 mutant lon146::</i> Tn10                                              | this study                 |

**Table S2.** Plasmids used in study

| <u>Plasmid</u>  | <u>Resistance markers</u>            | <u>Source or reference</u>       |
|-----------------|--------------------------------------|----------------------------------|
| pACYC184        | (Tc <sup>R</sup> )                   | Chang and Cohen, 1978            |
| pACYC-SymR      | (Tc <sup>R</sup> )                   | this study                       |
| pAZ3            | (Cm <sup>R</sup> )                   | this study                       |
| pAZ3-anti-SymR  | (Cm <sup>R</sup> )                   | this study                       |
| pBAD24          | (Ap <sup>R</sup> )                   | Guzman et al., 1995              |
| pBAD24-SymE     | (Ap <sup>R</sup> )                   | this study                       |
| pBAD24-SymE-SPA | (Ap <sup>R</sup> )                   | this study                       |
| pJL148          | (Ap <sup>R</sup> )                   | Zeghouf et al., 2004             |
| pKD4            | (Km <sup>R</sup> )                   | Datsenko and Wanner, 2000        |
| pCP20           | (Ap <sup>R</sup> , Cm <sup>R</sup> ) | Cherepanov and Wackernagel, 1995 |

**Table S3.** Oligonucleotides used in study

| <u>Name</u> | <u>Sequence (5' to 3', with relevant restriction sites underlined)</u>                       | <u>Use</u>                             |
|-------------|----------------------------------------------------------------------------------------------|----------------------------------------|
| yjiW-AR20   | CGCATAACCGACGGTGACATGACCGG                                                                   | <i>symE</i> mRNA Northern              |
| RyjC-R      | AGCGCGGTGCGGATGTGCG                                                                          | SymR RNA Northern , SymR RNA synthesis |
| Stm-F       | CAATCACTATTTTAGGGAATAGCCATCATGACT                                                            | SymR RNA (S.tm) Northern               |
| recA-R      | TCGTTCGATAGCCATTTTACTCC                                                                      | <i>recA</i> mRNA Northern              |
| ompA-R      | GCCACTGCAATCGCGATAGCTGTCTTTTCAT                                                              | <i>ompA</i> mRNA Northern              |
| RdID-R      | GCTAAGCTTAGAAAACCCCGCACGTTGCAGGTATG                                                          | RdID RNA Northern                      |
| 6S-R        | CCAACCGCGGAGCGCCACATTCTTGTGGTATG                                                             | 6S RNA Northern                        |
| lacI-R      | CAGCTCCGCCATCGCCGCTTCC                                                                       | <i>lacI</i> mRNA Northern              |
| TF-yjiW     | GCAGGTGCAGGCGTTTATTGGAGTGATTGCCGGTAAACAGAAAAGTCGCGTCCATGGAAAAGAGAAG                          | GSO114 PCR                             |
| TR-yjiW     | CTATTGAGTCAGTGGAAGGCTCCCGGTGGTTAACCGGAGTAAACGCTGCATATGAATATCCTCCTTAG                         | GSO114 PCR                             |
| yjiW-P1KO   | CCCGCATCGCTAATCACAATCACTATTCTGGAGAATAGCAGTTTAGCCATGGTCCATATGAATATCC                          | GSO117 PCR                             |
| yjiW-P2KO   | TGGAAGGCTCCCGGTGGTTAACCGGAGTAAACGCTGTTAGTGTAGGCTGGAGCTGCTTC                                  | GSO117 PCR                             |
| P-10F-PAGE  | CACAATCACTATTCTGGAGAATAGCAGTTATGACTGACACGCACTCCATTGCACAACCGTTCGAAGCAGAAGTCTCCCGGCAAATAACCGTC | GSO115 recombineering                  |
| lacI-GTA    | GATAGCGCCCGGAAGAGAGTCAATTCAGGGTGGTGAATGTAAAACAGTAACGTTATACGATGTCGCAGAGTATGCCGGTG             | lacI <sub>GTA</sub> mutant             |
| yjiW-Eco2   | TGAGAATTCAGGGTGATGCGGGGAATACG                                                                | pACYC-SymR PCR                         |
| yjiW-F2     | TATGAATTCGTATTTAGCGCGGTGCGGATGTGC                                                            | pACYC-SymR PCR                         |
| AryjC-Eco   | CAGGAATTCAGCGCGGTGCGGATGTGCGCCAAC                                                            | pAZ3-anti-SymR PCR                     |
| AryjC-Hin   | CAAAAGCTTAAAAAAAAGTCCTAACTGCTATTCTCCAGG                                                      | pAZ3-anti-SymR PCR                     |
| YjiW-NS     | ACTGACACGCATTCTATTGCACAACC                                                                   | pBAD-SymE & pBAD-SymE-SPA PCR          |
| YjiW-C      | TTACGCGACTTTCTGTTTACCG                                                                       | pBAD-SymE PCR                          |
| SPA-C       | CTACTTGTCATCGTCATCCTTGTAGTCG                                                                 | pBAD-SymE-SPA PCR                      |
| yjiW-5-T7   | TAATACGACTCACTATAGGGTATTTAGCGCGGTGCGGATGTGC                                                  | <i>symE</i> mRNA synthesis             |
| YjiW-3      | GAAGGCTCCCGGTGGTTAACC                                                                        | <i>symE</i> mRNA synthesis             |
| AyjiW-F-T7  | TAATACGACTCACTATAGGGAGTCATAACTGCTATTCTCCAGG                                                  | SymR RNA synthesis                     |
